# Supplementary material for: Phytoplankton Dynamics and Biogeochemistry of the Black Sea
Source: MDPI journal article supplement (doi:10.3390/jmse11061196), 2023-06-09
Supplement: s1 [file s1]

## Supplementary Materials for

### Phytoplankton dynamics and biogeochemistry of the Black Sea.

Vladimir Silkin\*, Larisa Pautova, Oleg Podymov, Valeryi Chasovnikov, Anna Lifanchuk, Alexey Fedorov and Agnislava Kluchantseva

Shirshov Institute of Oceanology, Russian Academy of Sciences, Moscow, Russia,

\* Corresponding author: vsilkin@mail.ru

This file includes:

Fig S1 -S3

Table S1 – S4

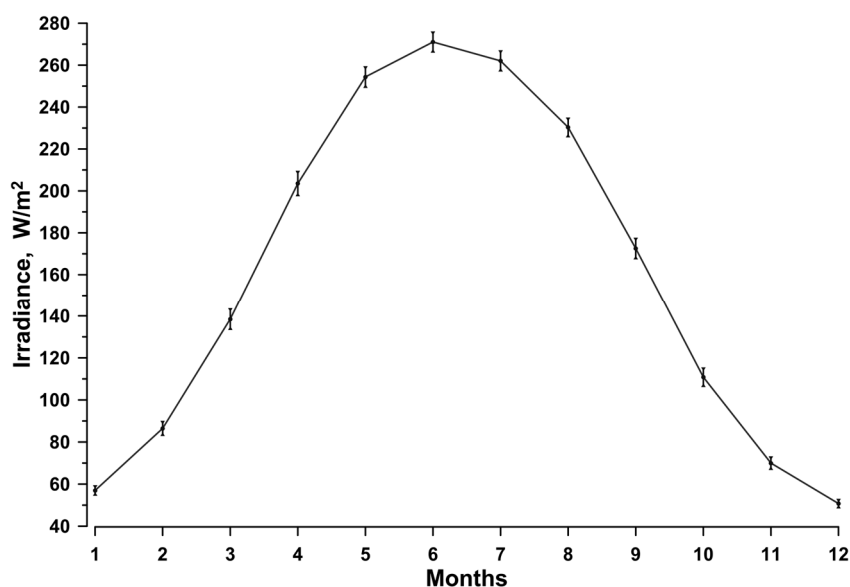

Fig S1. Annual irradiance dynamics on the water surface based on long-term (2006-2021) data.

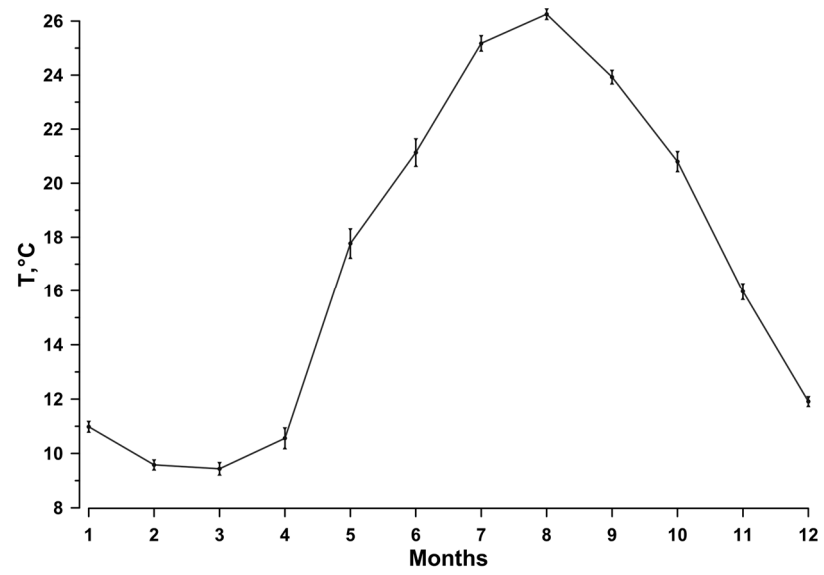

Fig S2. Annual dynamics of water surface temperature based on long-term (2006-2021) data.

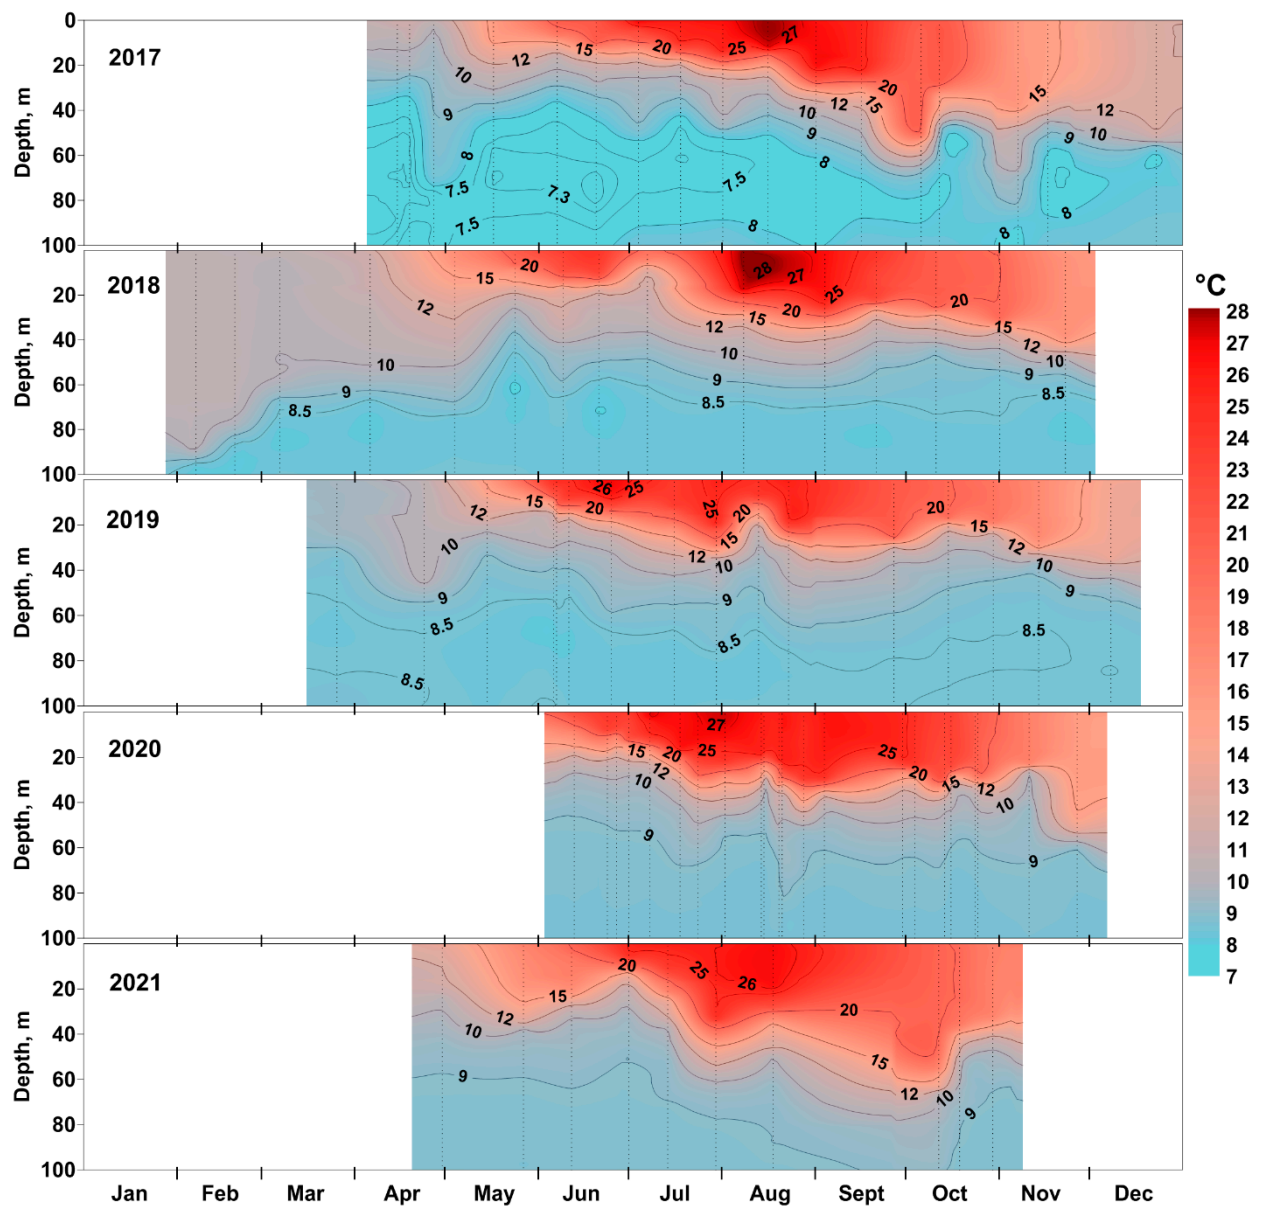

Fig S3. Seasonal dynamic of water temperature at station with depth 500 m from 2017 to 2021.

Table S1. The scheme of experiment for study the influence of nitrates and phosphates supply on phytoplankton growth.

| Variant of experiment | Nitrates (N) | Phosphates (P) |
|-----------------------|--------------|----------------|
| 1                     | -            | -              |
| 2                     | +            | -              |
| 3                     | -            | +              |
| 4                     | +            | +              |

Table S2. The phytoplankton composition of the upper mixed layer during the dominance of coccolithophorids in late spring and early summer 2017, 2018 and 2019.

| Statistic parameters | Diatoms            |       | Dinoflagellates    |       | Coccolithophores                         |                    |       | Small flagellates  |       |
|----------------------|--------------------|-------|--------------------|-------|------------------------------------------|--------------------|-------|--------------------|-------|
|                      | mg m <sup>-3</sup> | %     | mg m <sup>-3</sup> | %     | 10 <sup>6</sup><br>Cells L <sup>-1</sup> | mg m <sup>-3</sup> | %     | mg m <sup>-3</sup> | %     |
| 2017                 |                    |       |                    |       |                                          |                    |       |                    |       |
| Max                  | 1427               | 49    | 76.73              | 18    | 9.65                                     | 1737.22            | 99.00 | 42.11              | 12    |
| Min                  | 0                  | 49    | 3.09               | 0.26  | 1.0                                      | 188.01             | 49.35 | 4.15               | 0.29  |
| Average              | 37.96              | 1.43  | 19.75              | 1.96  | 6.9                                      | 1241.29            | 94.67 | 16.99              | 1.49  |
| 2018                 |                    |       |                    |       |                                          |                    |       |                    |       |
| Max                  | 23                 | 10.07 | 78                 | 35.76 | 1.5                                      | 264                | 74.51 | 141                | 41.06 |
| Min                  | 0                  | 0.07  | 22                 | 7.44  | 0.16                                     | 29                 | 22.73 | 12                 | 6.46  |
| Average              | 10                 | 4.54  | 42                 | 18.29 | 0.66                                     | 119                | 48.61 | 58                 | 22.21 |
| 2019                 |                    |       |                    |       |                                          |                    |       |                    |       |
| Max                  | 36                 | 13.00 | 2468               | 81.47 | 6.0                                      | 1085               | 87.06 | 112                | 17.18 |
| Min                  | 0                  | 0.00  | 20                 | 4.95  | 0.19                                     | 35                 | 14.35 | 20                 | 1.83  |
| Average              | 13                 | 2.12  | 162                | 18.68 | 2.7                                      | 488                | 69.15 | 54                 | 8.40  |

Table S3. The composition of phytoplankton of the upper mixed layer during the dominance of large diatoms in the summer of 2017-2021

| Stations   | Depth | Diatoms            |       | Dinoflagellates    |       | Coccolithophores   |       | Small flagellates  |       |
|------------|-------|--------------------|-------|--------------------|-------|--------------------|-------|--------------------|-------|
|            | m     | mg m <sup>-3</sup> | %     |
| 15.08.2017 |       |                    |       |                    |       |                    |       |                    |       |
| 500 m      | 0 m   | 1451.2             | 96.86 | 10.87              | 0.73  | 8.64               | 0.58  | 25.56              | 1.71  |
| 500 m      | 5 m   | 1609.7             | 98.25 | 14.48              | 0.88  | 4.55               | 0.28  | 7.51               | 0.46  |
| 500 m      | 10 m  | 439.4              | 92.08 | 16.22              | 3.40  | 10.94              | 2.29  | 5.25               | 1.10  |
| 19.07.2019 |       |                    |       |                    |       |                    |       |                    |       |
| 100 m      | 0 m   | 71.2               | 36.74 | 27.77              | 14.32 | 70.50              | 36.37 | 24.37              | 12.57 |

|            |      |         |            |       |       |       |       |        |       |
|------------|------|---------|------------|-------|-------|-------|-------|--------|-------|
| 100 m      | 10 m | 215     | 67.29      | 32.30 | 10.11 | 53.45 | 16.73 | 18.75  | 5.87  |
| 22.07.2020 |      |         |            |       |       |       |       |        |       |
| 500 m      | 0 m  | 3619.4  | 98.48      | 10.80 | 0.29  | 0.00  | 0.00  | 40.86  | 1.11  |
| 500 m      | 15 m | 4300.9  | 95.52      | 87.15 | 1.94  | 17.44 | 0.39  | 84.39  | 1.87  |
| 31.07.2020 |      |         |            |       |       |       |       |        |       |
| 500 m      | 14 m | 1462.4  | 96.54      | 22.69 | 1.50  | 0.00  | 0.00  | 29.28  | 1.93  |
|            |      |         | 16.08.2020 |       |       |       |       |        |       |
| 500 m      | 0 m  | 733.9   | 88.18      | 2.29  | 0.28  | 11.40 | 1.37  | 44.14  | 5.30  |
| 26.08.2020 |      |         |            |       |       |       |       |        |       |
| 500 m      | 0 m  | 365.3   | 84.29      | 2.63  | 0.61  | 3.17  | 0.73  | 49.63  | 11.45 |
| 500 m      | 10 m | 257.75  | 77.35      | 46.46 | 13.94 | 10.02 | 3.01  | 18.15  | 5.45  |
| 17.08.2021 |      |         |            |       |       |       |       |        |       |
| 500 m      | 0 m  | 3914.82 | 95.32      | 23.05 | 0.56  | 7.26  | 0.18  | 137.89 | 3.36  |

Table S4. Vertical distribution of nitrogen and phosphorus concentrations during the dominance of coccolithophore *Emiliania huxleyi* (11 June 2020) and large diatoms *Peudosolenia calcar-avis* (26 August 2021) at the station above a depth of 500 m.

| <i>E. huxleyi</i> |      |      |
|-------------------|------|------|
| m                 | P    | N    |
| 1                 | 0.22 | 0.31 |
| 14                | 0.16 | 0.36 |
| 33                | 0.18 | 0.29 |
| 50                | 0.20 | 0.42 |
| 70                | 0.26 | 1.19 |
| 90                | 0.32 | 1.29 |
| 107               | 0.42 | 2.26 |
| 119               | 0.78 | 3.73 |

|                       |      |      |
|-----------------------|------|------|
| 127                   | 1.23 | 5.97 |
| 131                   | 1.30 | 5.94 |
| 139                   | 1.34 | 6.19 |
| 151                   | 1.38 | 3.38 |
| 154                   | 1.62 | 3.42 |
| <i>P. calcar-avis</i> |      |      |
| 1                     | 0.06 | 1.31 |
| 10                    | 0.04 | 1.35 |
| 36                    | 0.04 | 1.56 |
| 50                    | 0.07 | 1.64 |
| 70                    | 0.15 | 2.25 |
| 98                    | 1.10 | 5.00 |
| 111                   | 1.13 | 6.80 |
| 122                   | 1.26 | 4.01 |
| 129                   | 1.36 | 3.91 |
| 135                   | 0.36 | 1.44 |
| 138                   | 2.57 | 1.99 |
| 142                   | 6.62 | 2.23 |
| 146                   | 6.90 | 3.49 |
| 150                   | 7.05 | 5.44 |
